# Supplementary material for: Integrated multiple-microarray analysis and mendelian randomization to identify novel targets involved in diabetic nephropathy
Source: PubMed Central journal article supplement (PMC10363738; doi:10.3389/fendo.2023.1191768), 2023-07-10
Supplement: Image_1.pdf [file Image_1.pdf]

## Supplementary Material

# Integrated multiple-microarray analysis and mendelian randomization to identify novel targets involved in diabetic nephropathy

### Supplementary Figures

**Figure S1. Boxplots of the gene expression data in the five GEO datasets.**

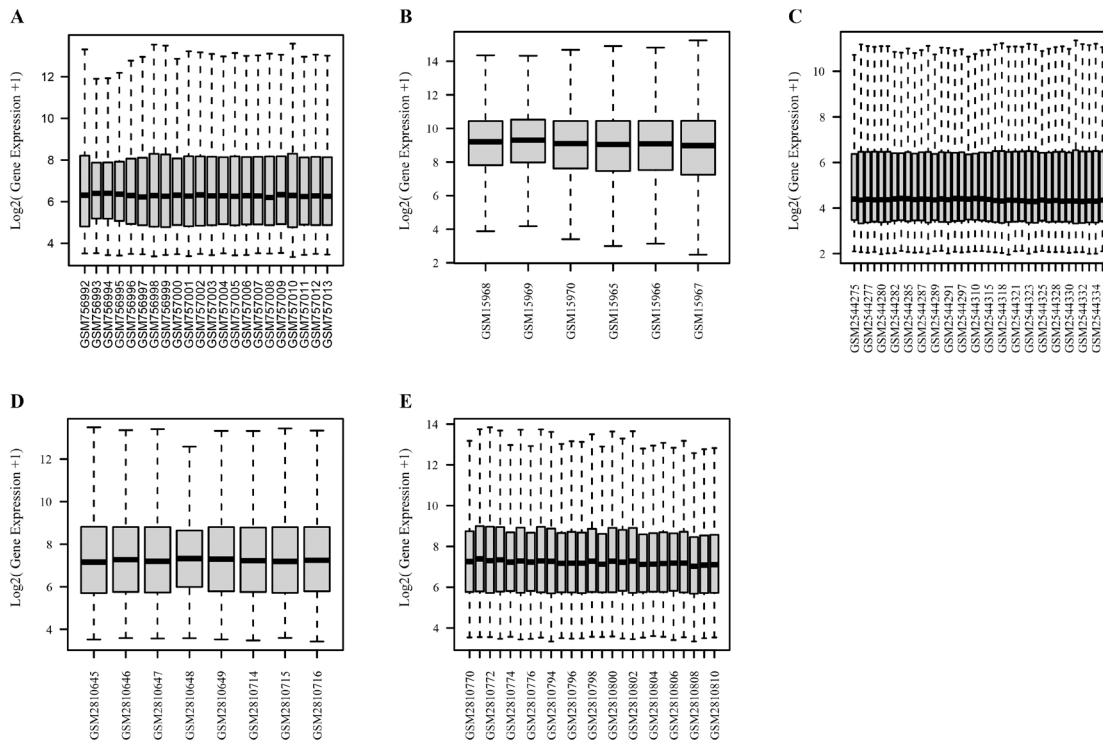

(A) GSE30528, (B) GSE1009, (C) GSE96804, (D) GSE104948\_GPL24120, (E) GSE104948\_GPL22945. The x-axis label represents the sample series and the y-axis represents the gene expression value. The horizontal black line in each box represents the median value of gene expression.

**Figure S2. PCA plots of the gene expression data in the five GEO datasets.**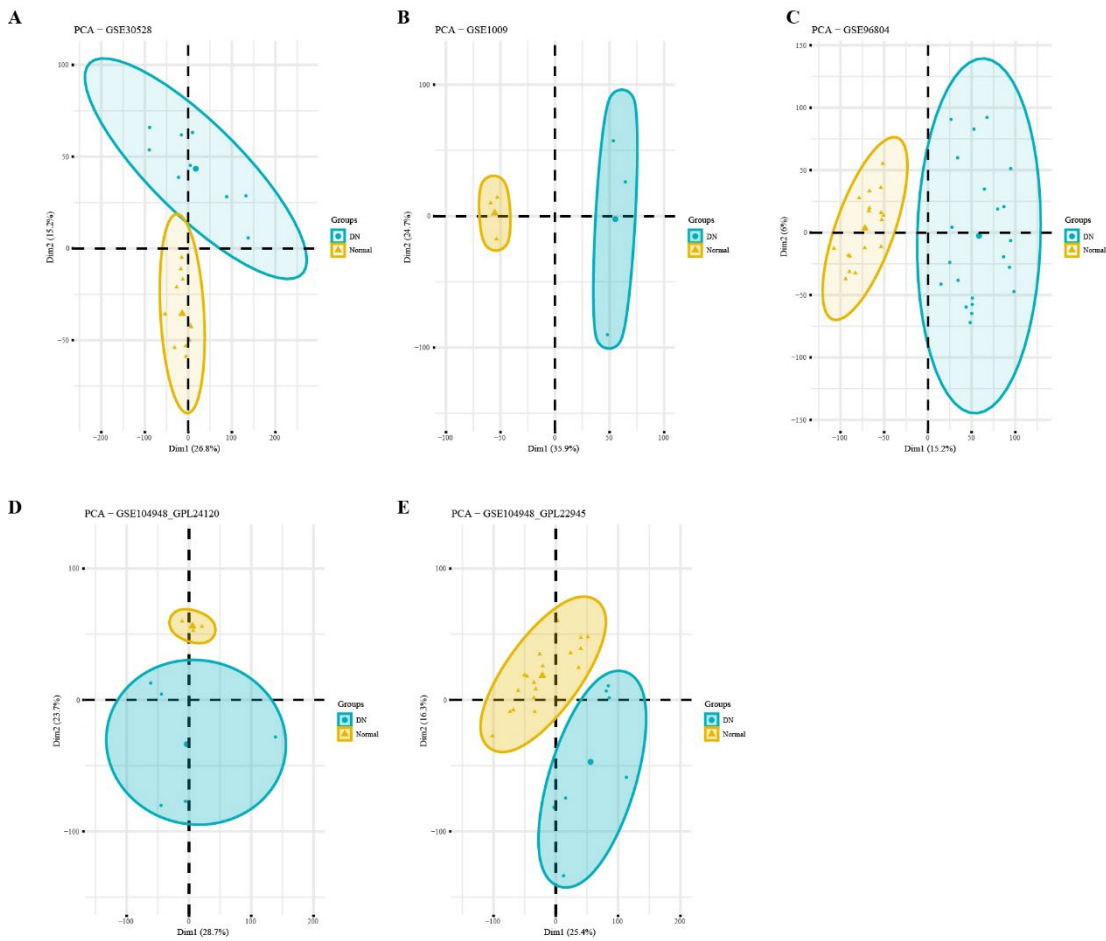

(A) GSE30528, (B) GSE1009, (C) GSE96804, (D) GSE104948\_GPL24120, (E) GSE104948\_GPL22945. The blue circle represents the diabetic nephropathy samples and the yellow circle represents the normal samples. The x-axis and the y-axis respectively describe two principal components.

**Figure S3. Volcano plots of the gene expression data in the five GEO datasets.**

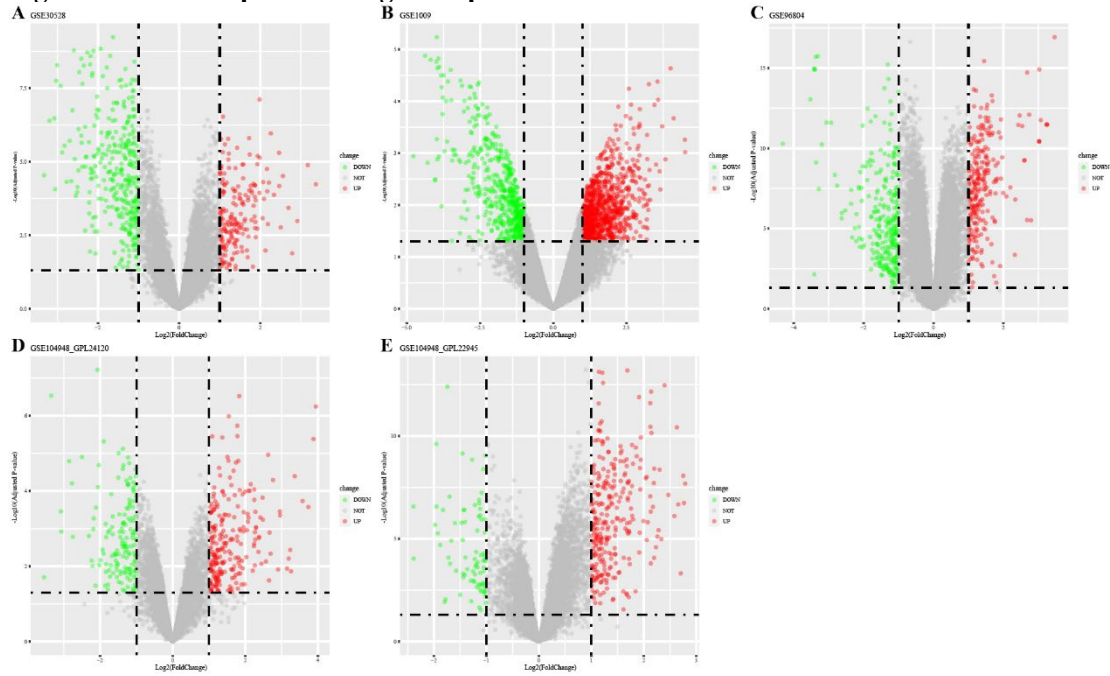

(A) GSE30528, (B) GSE1009, (C) GSE96804, (D) GSE104948\_GPL24120, (E) GSE104948\_GPL22945. The x-axis represents the  $\log_2(\text{FoldChange})$  and the y-axis represents the  $-\log_{10}(\text{Adjusted P-value})$ . The red dots indicate the upregulated genes and the green dots indicate the downregulated genes.
